# Supplementary material
Source: PubMed Central journal article supplement (PMC3263938)
Supplement: supp_111.042721_DMD_42721suppl.data.pdf [file supp_111.042721_DMD_42721suppl.data.pdf]

## **Supplementary data**

**Authors:** Suneet Shukla, Candice Schwartz, Khyati Kapoor, Abdul Kouanda, Suresh V.

Ambudkar

**Title:** Use of Baculovirus BacMam vectors for expression of ABC drug transporters in mammalian cells

**Journal:** Drug Metabolism and Disposition

**Figure S1:**

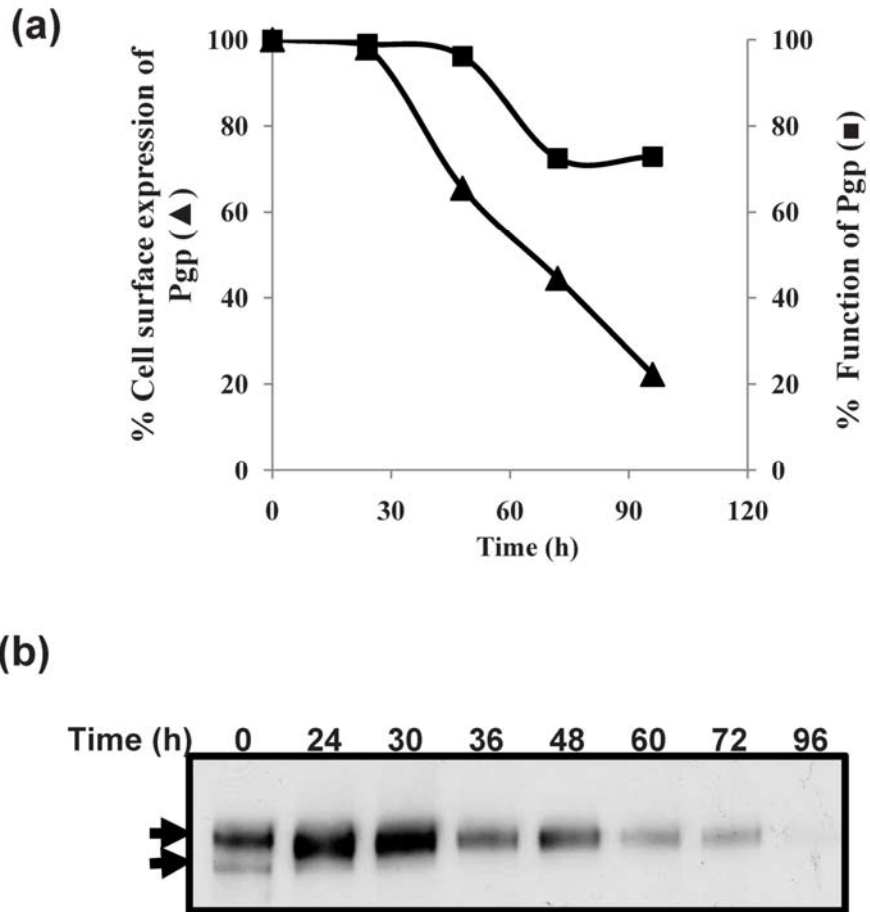

**Time course of cell surface Pgp expression after transduction with the BacMam Pgp virus.**

(a) HeLa cells (2.5 million) were transduced with baculovirus at 1:50 viral particles and then grown in the presence of 10 mM butyric acid for 24 hrs as described in Material and Methods.

After 24 hrs incubation, the growth medium was then removed and fresh medium (without baculovirus) was added and this point was taken as 0 hr. The cells were further grown for different times (0, 24 h, 48 h, 72 h and 96 h) at 37°C. The cell surface expression of Pgp

(triangles) and its transport function (squares) was expressed as a function of time (b) Total Pgp

expression in the cell lysates (20,000 cells) was also monitored at indicated times (in hrs) and was checked by Western blot analysis using the C219 monoclonal antibody. The arrows represent glycosylated (upper) or non-glycosylated (lower) forms of Pgp.

**Figure S2:**

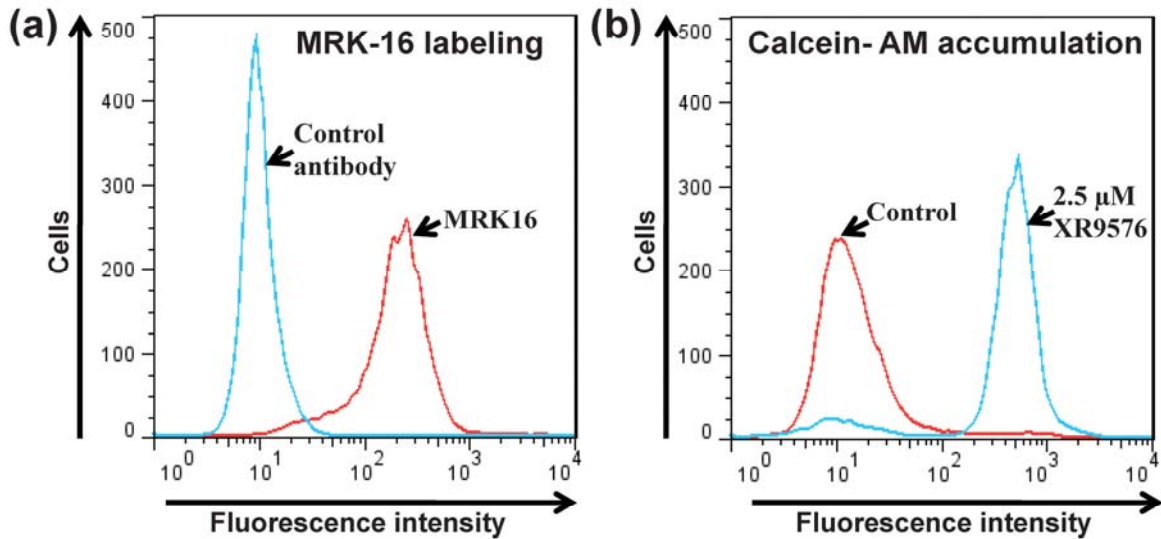

**Cell surface expression and function of Pgp in BacMam-Pgp-transduced cells recovered from frozen stocks:** HeLa cells were transduced with BacMam-Pgp virus as described in methods and stored frozen at -80°C. After storage at -80°C for 1-4 weeks, the cells were thawed in DMEM media for 24 hrs and were evaluated for (a) cell surface expression and (b) function using MRK16 staining and calcein-AM efflux assays, respectively, as described in the methods section.
